# Supplementary material for: Use of gas chromatography mass spectrometry to elucidate metabolites predicting the phenotypes of IgA nephropathy in hyper IgA mice
Source: PubMed Central journal article supplement (PMC6619804; doi:10.1371/journal.pone.0219403), 2019-07-10
Supplement: pone.0219403.s008.pdf [file pone.0219403.s008.pdf]

S1 Table

| <b>A. Metabolites significantly higher in HIGA mice in 12 week old</b> |               |           |                  |           |                |                    |
|------------------------------------------------------------------------|---------------|-----------|------------------|-----------|----------------|--------------------|
| <b>Metabolites</b>                                                     | <b>Balb/c</b> |           | <b>HIGA mice</b> |           | <b>p-value</b> | <b>HIGA/Balb/c</b> |
| Glucuronic acid-5TMS(2)                                                | 0.00168       | ± 0.00009 | 0.00487          | ± 0.00030 | <0.00001       | 2.89541            |
| Mannose-meto-5TMS(1)                                                   | 0.09830       | ± 0.00661 | 0.19699          | ± 0.01158 | <0.00001       | 2.00393            |
| Allose-meto-5TMS(1)                                                    | 0.09652       | ± 0.00645 | 0.19148          | ± 0.01124 | <0.00001       | 1.98378            |
| Uracil-2TMS                                                            | 0.00146       | ± 0.00014 | 0.00320          | ± 0.00016 | <0.00001       | 2.19080            |
| Xanthine-3TMS                                                          | 0.00086       | ± 0.00050 | 0.00799          | ± 0.00124 | 0.00006        | 9.25704            |
| Psicose-5TMS(1)                                                        | 0.00080       | ± 0.00005 | 0.00156          | ± 0.00010 | 0.00007        | 1.94161            |
| Inositol phosphate-7TMS                                                | 0.00606       | ± 0.00037 | 0.00930          | ± 0.00054 | 0.00010        | 1.53509            |
| Gluconic acid-6TMS                                                     | 0.00018       | ± 0.00003 | 0.00061          | ± 0.00008 | 0.00017        | 3.43576            |
| 2-Ketoisocaproic acid-meto-TMS(2)                                      | 0.00258       | ± 0.00009 | 0.00361          | ± 0.00014 | 0.00013        | 1.39916            |
| Myristic acid-TMS                                                      | 0.00653       | ± 0.00032 | 0.01191          | ± 0.00078 | 0.00015        | 1.82336            |
| 4-Aminobenzoic acid-2TMS                                               | 0.00007       | ± 0.00003 | 0.00121          | ± 0.00024 | 0.00038        | 18.03908           |
| Xylitol-5TMS                                                           | 0.00099       | ± 0.00005 | 0.00144          | ± 0.00008 | 0.00017        | 1.45141            |
| Psicose-5TMS(2)                                                        | 0.00060       | ± 0.00008 | 0.00135          | ± 0.00011 | 0.00039        | 2.23584            |
| Alanine-2TMS                                                           | 0.02142       | ± 0.00316 | 0.04543          | ± 0.00371 | 0.00051        | 2.12132            |
| Glucuronic acid lactone-3TMS(1)                                        | 0.00156       | ± 0.00006 | 0.00245          | ± 0.00015 | 0.00061        | 1.57312            |
| 2-Aminoethanol-3TMS                                                    | 0.04199       | ± 0.00215 | 0.05368          | ± 0.00171 | 0.00064        | 1.27865            |
| Acetylglycine-TMS                                                      | 0.04199       | ± 0.00215 | 0.05368          | ± 0.00171 | 0.00064        | 1.27865            |
| Glucuronic acid-5TMS(1)                                                | 0.00118       | ± 0.00009 | 0.00198          | ± 0.00013 | 0.00073        | 1.68309            |
| Tagatose-5TMS(1)                                                       | 0.00079       | ± 0.00007 | 0.00144          | ± 0.00011 | 0.00103        | 1.81158            |
| Glucose-5TMS(1)                                                        | 2.06144       | ± 0.08080 | 2.40867          | ± 0.05217 | 0.00143        | 1.16844            |
| N6-Acetyllysine-2TMS                                                   | 0.01840       | ± 0.00128 | 0.02324          | ± 0.00067 | 0.00147        | 1.26333            |
| Sorbitol-6TMS                                                          | 0.00669       | ± 0.00076 | 0.01296          | ± 0.00115 | 0.00176        | 1.93684            |
| Pantothenic acid-3TMS                                                  | 0.00250       | ± 0.00016 | 0.00373          | ± 0.00022 | 0.00183        | 1.49035            |
| Lyxose-4TMS(1)                                                         | 0.00379       | ± 0.00045 | 0.01193          | ± 0.00221 | 0.00281        | 3.14900            |
| Indol-3-acetic acid-TMS                                                | 0.02195       | ± 0.00138 | 0.02762          | ± 0.00090 | 0.00215        | 1.25844            |
| Fucose-4TMS(1)                                                         | 0.00113       | ± 0.00013 | 0.00199          | ± 0.00021 | 0.00226        | 1.76489            |
| Inosine-4TMS                                                           | 0.00043       | ± 0.00010 | 0.00867          | ± 0.00237 | 0.00415        | 20.18891           |
| Galactitol-6TMS                                                        | 0.00706       | ± 0.00071 | 0.01296          | ± 0.00115 | 0.00274        | 1.83617            |
| Glyceric acid-3TMS                                                     | 0.00245       | ± 0.00013 | 0.00343          | ± 0.00019 | 0.00308        | 1.40029            |
| Coniferyl alcohol-2TMS                                                 | 0.00299       | ± 0.00013 | 0.00403          | ± 0.00020 | 0.00320        | 1.34618            |
| Glucuronic acid-meto-5TMS(1)                                           | 0.00517       | ± 0.00042 | 0.00793          | ± 0.00053 | 0.00323        | 1.53207            |
| meso-Erythritol-4TMS                                                   | 0.00070       | ± 0.00008 | 0.00121          | ± 0.00010 | 0.00360        | 1.72877            |
| Lactic acid-13C3-2TMS                                                  | 0.00000       | ± 0.00225 | 0.00000          | ± 0.00068 | 0.00593        | N/A                |
| Galactosamine-5TMS(1)                                                  | 0.01327       | ± 0.00071 | 0.02215          | ± 0.00189 | 0.00442        | 1.66865            |
| Urea-2TMS                                                              | 8.30846       | ± 0.25516 | 10.26836         | ± 0.41073 | 0.00481        | 1.23589            |

|                               |         |   |         |         |   |         |         |         |
|-------------------------------|---------|---|---------|---------|---|---------|---------|---------|
| Mannose-meto-5TMS(2)          | 4.43481 | ± | 0.27487 | 5.37962 | ± | 0.16488 | 0.00561 | 1.21304 |
| Galactose-meto-5TMS(2)        | 4.43481 | ± | 0.27487 | 5.37423 | ± | 0.16474 | 0.00582 | 1.21183 |
| Glucose-meto-5TMS(2)          | 4.43131 | ± | 0.27460 | 5.36632 | ± | 0.16465 | 0.00598 | 1.21100 |
| Glycine-2TMS                  | 0.00129 | ± | 0.00017 | 0.00219 | ± | 0.00019 | 0.00677 | 1.69908 |
| N-Acetylglutamine-2TMS        | 0.09745 | ± | 0.00599 | 0.11806 | ± | 0.00402 | 0.00899 | 1.21146 |
| Glucosamine-5TMS(1)           | 0.01298 | ± | 0.00081 | 0.01579 | ± | 0.00056 | 0.00979 | 1.21603 |
| Linoleic acid-TMS             | 0.00675 | ± | 0.00058 | 0.00967 | ± | 0.00089 | 0.01265 | 1.43214 |
| Lactic acid-2TMS              | 0.24797 | ± | 0.03048 | 0.43608 | ± | 0.04572 | 0.01316 | 1.75865 |
| Ribulose-4TMS                 | 0.00107 | ± | 0.00015 | 0.00184 | ± | 0.00019 | 0.01521 | 1.71585 |
| Palmitoleic acid-TMS          | 0.00104 | ± | 0.00021 | 0.00210 | ± | 0.00035 | 0.01721 | 2.02758 |
| Tyramine-3TMS                 | 0.01086 | ± | 0.00084 | 0.01306 | ± | 0.00044 | 0.01817 | 1.20258 |
| Lysine-4TMS                   | 0.12678 | ± | 0.00868 | 0.16878 | ± | 0.01440 | 0.02193 | 1.33129 |
| 5-Methoxytryptamine-2TMS      | 0.00328 | ± | 0.00063 | 0.01194 | ± | 0.00347 | 0.02791 | 3.63407 |
| Fructose-meto-5TMS(2)         | 0.00385 | ± | 0.00028 | 0.00548 | ± | 0.00044 | 0.02393 | 1.42280 |
| 5-Dehydroquinic acid-5TMS     | 0.00127 | ± | 0.00015 | 0.00163 | ± | 0.00007 | 0.02403 | 1.28379 |
| Threonic acid-4TMS            | 0.00825 | ± | 0.00039 | 0.01121 | ± | 0.00088 | 0.03235 | 1.35953 |
| 1,5-Anhydro-glucitol-4TMS     | 0.01178 | ± | 0.00033 | 0.01456 | ± | 0.00083 | 0.03318 | 1.23604 |
| 2-Hydroxyisobutyric acid-2TMS | 0.00111 | ± | 0.00015 | 0.00194 | ± | 0.00024 | 0.03354 | 1.73829 |
| Dihydroorotic acid-3TMS       | 0.00274 | ± | 0.00014 | 0.00368 | ± | 0.00029 | 0.03904 | 1.34028 |
| Galactose-5TMS(2)             | 0.20826 | ± | 0.00699 | 0.25306 | ± | 0.01377 | 0.03987 | 1.21511 |
| Mannose-5TMS(2)               | 0.20826 | ± | 0.00699 | 0.25306 | ± | 0.01377 | 0.03987 | 1.21511 |
| Allose-5TMS                   | 0.20826 | ± | 0.00699 | 0.25306 | ± | 0.01377 | 0.03987 | 1.21511 |
| Taurine-3TMS                  | 0.16493 | ± | 0.01459 | 0.27369 | ± | 0.03420 | 0.04253 | 1.65940 |
| Cystamine-nTMS                | 0.00074 | ± | 0.00007 | 0.00102 | ± | 0.00008 | 0.04399 | 1.36546 |
| Taurine-13C2-3TMS             | 0.02870 | ± | 0.00294 | 0.04830 | ± | 0.00627 | 0.04648 | 1.68299 |
| Cinnamic acid-TMS             | 0.00095 | ± | 0.00008 | 0.00129 | ± | 0.00011 | 0.04920 | 1.36381 |

### B. Metabolites significantly lower in HIGA mice in 12 weeks old

| Metabolites                    | Balb/c  |   | HIGA mice |         | p-value | HIGA/Balb/c |          |         |
|--------------------------------|---------|---|-----------|---------|---------|-------------|----------|---------|
| Tyrosine-3TMS                  | 0.00510 | ± | 0.00035   | 0.00254 | ±       | 0.00019     | <0.00001 | 0.49751 |
| Coniferyl aldehyde-meto-TMS(1) | 0.00217 | ± | 0.00027   | 0.00104 | ±       | 0.00014     | 0.00059  | 0.48068 |
| Tiglylglycine-TMS              | 0.00479 | ± | 0.00049   | 0.00332 | ±       | 0.00030     | 0.01353  | 0.69166 |
| Hypotaurine-3TMS               | 0.01620 | ± | 0.00147   | 0.01207 | ±       | 0.00101     | 0.03020  | 0.74505 |
| Oxalic acid-2TMS               | 0.00236 | ± | 0.00053   | 0.00109 | ±       | 0.00013     | 0.05456  | 0.46263 |
| 3-Methylcrotonoylglycine-TMS   | 0.00455 | ± | 0.00041   | 0.00331 | ±       | 0.00033     | 0.03748  | 0.72788 |
| Tryptophan-3TMS                | 0.00118 | ± | 0.00009   | 0.00068 | ±       | 0.00016     | 0.04356  | 0.57495 |

Data were mean ± SEM.
