# Supplementary material for: Use of gas chromatography mass spectrometry to elucidate metabolites predicting the phenotypes of IgA nephropathy in hyper IgA mice
Source: PubMed Central journal article supplement (PMC6619804; doi:10.1371/journal.pone.0219403), 2019-07-10
Supplement: pone.0219403.s009.pdf [file pone.0219403.s009.pdf]

S2 Table

| <b>A. Metabolites significantly higher in HIGA mice in 22 weeks old</b> |               |         |                  |         |                |                    |
|-------------------------------------------------------------------------|---------------|---------|------------------|---------|----------------|--------------------|
| <b>Metabolites</b>                                                      | <b>Balb/c</b> |         | <b>HIGA mice</b> |         | <b>p-value</b> | <b>HIGA/Balb/c</b> |
| Glucuronic acid-5TMS(2)                                                 | 0.00188 ±     | 0.00013 | 0.00470 ±        | 0.00024 | <0.00001       | 2.49209            |
| Xanthine-3TMS                                                           | 0.00111 ±     | 0.00043 | 0.00895 ±        | 0.00098 | <0.00001       | 8.03874            |
| Inosine-4TMS                                                            | 0.00029 ±     | 0.00011 | 0.00546 ±        | 0.00072 | 0.00001        | 18.56310           |
| 4-Aminobenzoic acid-2TMS                                                | 0.00015 ±     | 0.00003 | 0.00136 ±        | 0.00021 | 0.00005        | 8.90803            |
| Threonic acid-4TMS                                                      | 0.01194 ±     | 0.00089 | 0.01850 ±        | 0.00075 | 0.00004        | 1.54915            |
| Sorbitol-6TMS                                                           | 0.01114 ±     | 0.00133 | 0.02119 ±        | 0.00122 | 0.00007        | 1.90193            |
| Xylitol-5TMS                                                            | 0.00135 ±     | 0.00007 | 0.00197 ±        | 0.00008 | 0.00008        | 1.45456            |
| Myristic acid-TMS                                                       | 0.00773 ±     | 0.00053 | 0.01285 ±        | 0.00069 | 0.00010        | 1.66276            |
| N-Acetylglutamine-2TMS                                                  | 0.10443 ±     | 0.00498 | 0.13913 ±        | 0.00439 | 0.00011        | 1.33230            |
| Galactitol-6TMS                                                         | 0.01005 ±     | 0.00173 | 0.02089 ±        | 0.00132 | 0.00011        | 2.07812            |
| Psicose-5TMS(1)                                                         | 0.00103 ±     | 0.00008 | 0.00169 ±        | 0.00009 | 0.00012        | 1.64356            |
| 2-Aminoethanol-2TMS                                                     | 0.00576 ±     | 0.00080 | 0.01257 ±        | 0.00096 | 0.00019        | 2.18168            |
| Glucuronic acid-5TMS(1)                                                 | 0.00132 ±     | 0.00007 | 0.00249 ±        | 0.00025 | 0.00041        | 1.88544            |
| Glucose-5TMS(1)                                                         | 2.17224 ±     | 0.05205 | 2.63608 ±        | 0.06862 | 0.00029        | 1.21353            |
| Psicose-5TMS(3)                                                         | 0.00120 ±     | 0.00008 | 0.00166 ±        | 0.00007 | 0.00085        | 1.37779            |
| Acetylglycine-TMS                                                       | 0.02843 ±     | 0.00231 | 0.04503 ±        | 0.00356 | 0.00095        | 1.58383            |
| Inositol phosphate-7TMS                                                 | 0.00550 ±     | 0.00031 | 0.00962 ±        | 0.00073 | 0.00099        | 1.75006            |
| meso-Erythritol-4TMS                                                    | 0.00098 ±     | 0.00003 | 0.00138 ±        | 0.00010 | 0.00141        | 1.41240            |
| Glucuronic acid-meto-5TMS(1)                                            | 0.00711 ±     | 0.00028 | 0.00957 ±        | 0.00059 | 0.00151        | 1.34646            |
| Tagatose-5TMS(1)                                                        | 0.00104 ±     | 0.00010 | 0.00154 ±        | 0.00008 | 0.00175        | 1.47613            |
| N-Acetylglutamine-3TMS                                                  | 0.19915 ±     | 0.00549 | 0.23193 ±        | 0.00572 | 0.00178        | 1.16460            |
| N6-Acetyllysine-2TMS                                                    | 0.02183 ±     | 0.00122 | 0.02708 ±        | 0.00083 | 0.00190        | 1.24074            |
| Galactose-meto-5TMS(2)                                                  | 5.09365 ±     | 0.28196 | 6.35333 ±        | 0.20402 | 0.00195        | 1.24730            |
| Glucose-meto-5TMS(2)                                                    | 5.08942 ±     | 0.28285 | 6.34223 ±        | 0.20328 | 0.00201        | 1.24616            |
| Mannose-meto-5TMS(2)                                                    | 5.10482 ±     | 0.28394 | 6.36115 ±        | 0.20403 | 0.00203        | 1.24611            |
| Galactose-5TMS(2)                                                       | 0.21135 ±     | 0.01054 | 0.26775 ±        | 0.00979 | 0.00203        | 1.26687            |
| Mannose-5TMS(2)                                                         | 0.21135 ±     | 0.01054 | 0.26775 ±        | 0.00979 | 0.00203        | 1.26687            |
| Allose-5TMS                                                             | 0.21135 ±     | 0.01054 | 0.26775 ±        | 0.00979 | 0.00203        | 1.26687            |
| Psicose-5TMS(2)                                                         | 0.00100 ±     | 0.00011 | 0.00154 ±        | 0.00009 | 0.00218        | 1.54426            |
| Glucosamine-5TMS(1)                                                     | 0.01531 ±     | 0.00104 | 0.01902 ±        | 0.00054 | 0.00229        | 1.24245            |
| Tyramine-3TMS                                                           | 0.01290 ±     | 0.00092 | 0.01653 ±        | 0.00057 | 0.00231        | 1.28135            |
| Galactosamine-5TMS(1)                                                   | 0.01456 ±     | 0.00085 | 0.02193 ±        | 0.00142 | 0.00246        | 1.50628            |
| Glucuronic acid lactone-3TMS(1)                                         | 0.00196 ±     | 0.00012 | 0.00275 ±        | 0.00021 | 0.00401        | 1.40717            |
| Indol-3-acetic acid-TMS                                                 | 0.02685 ±     | 0.00148 | 0.03265 ±        | 0.00106 | 0.00509        | 1.21621            |
| Psicose-meto-5TMS(1)                                                    | 0.00512 ±     | 0.00027 | 0.00660 ±        | 0.00030 | 0.00542        | 1.29007            |

|                                   |         |   |         |         |   |         |         |         |
|-----------------------------------|---------|---|---------|---------|---|---------|---------|---------|
| Ascorbic acid-4TMS                | 0.00442 | ± | 0.00020 | 0.00586 | ± | 0.00042 | 0.00586 | 1.32793 |
| Ribulose-4TMS                     | 0.00114 | ± | 0.00010 | 0.00179 | ± | 0.00014 | 0.00561 | 1.57127 |
| 2-Aminoethanol-3TMS               | 0.02839 | ± | 0.00233 | 0.04503 | ± | 0.00356 | 0.00579 | 1.58605 |
| Lyxose-4TMS(1)                    | 0.00237 | ± | 0.00041 | 0.00400 | ± | 0.00031 | 0.00586 | 1.68796 |
| Dihydroorotic acid-3TMS           | 0.00270 | ± | 0.00017 | 0.00418 | ± | 0.00045 | 0.00733 | 1.55121 |
| 2-Ketoisocaproic acid-meto-TMS(2) | 0.00337 | ± | 0.00025 | 0.00474 | ± | 0.00029 | 0.00656 | 1.40926 |
| Tropic acid-2TMS                  | 0.00200 | ± | 0.00008 | 0.00240 | ± | 0.00008 | 0.00738 | 1.19815 |
| Pyridoxine-3TMS                   | 0.00554 | ± | 0.00044 | 0.00677 | ± | 0.00020 | 0.00834 | 1.22346 |
| Taurine-13C2-3TMS                 | 0.04192 | ± | 0.00300 | 0.06270 | ± | 0.00670 | 0.01146 | 1.49559 |
| Fucose-4TMS(1)                    | 0.00099 | ± | 0.00011 | 0.00165 | ± | 0.00015 | 0.01158 | 1.65778 |
| N-Acetylglutamine-4TMS            | 0.02862 | ± | 0.00143 | 0.03541 | ± | 0.00156 | 0.01212 | 1.23701 |
| 1,5-Anhydro-glucitol-4TMS         | 0.01187 | ± | 0.00063 | 0.01486 | ± | 0.00069 | 0.01222 | 1.25176 |
| Taurine-3TMS                      | 0.23785 | ± | 0.01658 | 0.34801 | ± | 0.03620 | 0.01300 | 1.46317 |
| Trichloroacetic acid-TMS          | 0.05384 | ± | 0.00778 | 0.11005 | ± | 0.01431 | 0.01570 | 2.04395 |
| Lactic acid-2TMS                  | 0.21056 | ± | 0.03173 | 0.43481 | ± | 0.05701 | 0.01572 | 2.06501 |
| Mannose-meto-5TMS(1)              | 0.18147 | ± | 0.02416 | 0.24739 | ± | 0.01311 | 0.01657 | 1.36327 |
| 2-Hydroxyisobutyric acid-2TMS     | 0.00086 | ± | 0.00018 | 0.00194 | ± | 0.00028 | 0.01677 | 2.25805 |
| Uracil-2TMS                       | 0.00164 | ± | 0.00015 | 0.00226 | ± | 0.00015 | 0.01969 | 1.37760 |
| Pantothenic acid-3TMS             | 0.00231 | ± | 0.00027 | 0.00342 | ± | 0.00028 | 0.02128 | 1.48009 |
| Fructose-meto-5TMS(2)             | 0.00522 | ± | 0.00032 | 0.00634 | ± | 0.00027 | 0.02190 | 1.21456 |
| 5-Dehydroquinic acid-5TMS         | 0.00141 | ± | 0.00010 | 0.00180 | ± | 0.00010 | 0.02267 | 1.28189 |
| Coniferyl alcohol-2TMS            | 0.00387 | ± | 0.00017 | 0.00476 | ± | 0.00024 | 0.02318 | 1.23151 |
| Allose-meto-5TMS(1)               | 0.18026 | ± | 0.02438 | 0.23626 | ± | 0.01141 | 0.02733 | 1.31069 |
| 4-Hydroxyphenyllactic acid-3TMS   | 0.03306 | ± | 0.00123 | 0.03720 | ± | 0.00109 | 0.03092 | 1.12516 |
| Succinic acid-2TMS                | 0.00370 | ± | 0.00019 | 0.00588 | ± | 0.00066 | 0.03391 | 1.59226 |
| Pimelic acid-2TMS                 | 0.10084 | ± | 0.00131 | 0.10367 | ± | 0.00066 | 0.04335 | 1.02810 |
| Galactose-meto-5TMS(1)            | 4.73092 | ± | 0.06733 | 5.62500 | ± | 0.29592 | 0.04967 | 1.18899 |

### **B. Representative metabolites significantly lower in HIGA mice in 22 weeks old**

| <b>Metabolites</b>             | <b>Balb/c</b> |   | <b>HIGA mice</b> |         | <b>p-value</b> | <b>HIGA/Balb/c</b> |         |         |
|--------------------------------|---------------|---|------------------|---------|----------------|--------------------|---------|---------|
| Aspartic acid-3TMS             | 0.00281       | ± | 0.00015          | 0.00207 | ±              | 0.00013            | 0.00279 | 0.73385 |
| Coniferyl aldehyde-meto-TMS(1) | 0.00228       | ± | 0.00039          | 0.00121 | ±              | 0.00015            | 0.00568 | 0.53221 |
| Tyrosine-3TMS                  | 0.00595       | ± | 0.00088          | 0.00327 | ±              | 0.00025            | 0.02270 | 0.54995 |
| Threonine-3TMS                 | 0.11375       | ± | 0.01177          | 0.07815 | ±              | 0.00723            | 0.01401 | 0.68707 |
| Glycine-3TMS                   | 0.19522       | ± | 0.00795          | 0.15976 | ±              | 0.00935            | 0.02415 | 0.81838 |
| O-Acetylserine-2TMS            | 0.25075       | ± | 0.02363          | 0.18547 | ±              | 0.01486            | 0.02483 | 0.73965 |

|                       |         |   |         |         |   |         |         |         |
|-----------------------|---------|---|---------|---------|---|---------|---------|---------|
| Isobutyrylglycine-TMS | 0.01677 | ± | 0.00146 | 0.01272 | ± | 0.00093 | 0.02521 | 0.75886 |
| Tryptophan-3TMS       | 0.00237 | ± | 0.00042 | 0.00158 | ± | 0.00016 | 0.04408 | 0.66721 |
| Hypotaaurine-3TMS     | 0.01736 | ± | 0.00105 | 0.01372 | ± | 0.00109 | 0.04874 | 0.79055 |

---

Data were mean ± SEM.
