# Supplementary material for: Use of gas chromatography mass spectrometry to elucidate metabolites predicting the phenotypes of IgA nephropathy in hyper IgA mice
Source: PubMed Central journal article supplement (PMC6619804; doi:10.1371/journal.pone.0219403), 2019-07-10
Supplement: pone.0219403.s010.pdf [file pone.0219403.s010.pdf]

S3 Table

| <b>A. Metabolites significantly higher in HIGA mice in 32 weeks old</b> |               |           |                  |           |                |                    |
|-------------------------------------------------------------------------|---------------|-----------|------------------|-----------|----------------|--------------------|
| <b>Metabolites</b>                                                      | <b>Balb/c</b> |           | <b>HIGA mice</b> |           | <b>p-value</b> | <b>HIGA/Balb/c</b> |
| Glucuronic acid-5TMS(2)                                                 | 0.00195       | ± 0.00013 | 0.00401          | ± 0.00011 | <0.00001       | 2.06108            |
| Leucine-2TMS                                                            | 0.01156       | ± 0.00076 | 0.03006          | ± 0.00269 | 0.00001        | 2.59975            |
| Alanine-2TMS                                                            | 0.01485       | ± 0.00116 | 0.03163          | ± 0.00224 | 0.00007        | 2.13050            |
| Valine-2TMS                                                             | 0.08835       | ± 0.00379 | 0.14761          | ± 0.01118 | 0.00013        | 1.67076            |
| Inositol phosphate-7TMS                                                 | 0.00365       | ± 0.00035 | 0.00675          | ± 0.00040 | 0.00009        | 1.85005            |
| Xylitol-5TMS                                                            | 0.00106       | ± 0.00010 | 0.00195          | ± 0.00012 | 0.00010        | 1.82945            |
| Propionylglycine-TMS                                                    | 0.01312       | ± 0.00068 | 0.01920          | ± 0.00105 | 0.00011        | 1.46358            |
| Phenylalanine-2TMS                                                      | 0.07975       | ± 0.00089 | 0.10720          | ± 0.00579 | 0.00038        | 1.34424            |
| allo-Isoleucine-2TMS                                                    | 0.00631       | ± 0.00041 | 0.01317          | ± 0.00144 | 0.00036        | 2.08706            |
| Myristic acid-TMS                                                       | 0.04126       | ± 0.00315 | 0.06338          | ± 0.00303 | 0.00022        | 1.53618            |
| Methylmalonic acid-2TMS                                                 | 0.00095       | ± 0.00005 | 0.00169          | ± 0.00016 | 0.00041        | 1.78943            |
| Serine-3TMS                                                             | 0.00691       | ± 0.00026 | 0.00933          | ± 0.00050 | 0.00041        | 1.34969            |
| N-Acetylglutamine-4TMS                                                  | 0.03096       | ± 0.00128 | 0.04200          | ± 0.00170 | 0.00042        | 1.35685            |
| Psicose-5TMS(3)                                                         | 0.00143       | ± 0.00005 | 0.00201          | ± 0.00010 | 0.00073        | 1.40097            |
| Galactose-5TMS(2)                                                       | 0.23864       | ± 0.00783 | 0.30036          | ± 0.01004 | 0.00074        | 1.25862            |
| Mannose-5TMS(2)                                                         | 0.23864       | ± 0.00783 | 0.30036          | ± 0.01004 | 0.00074        | 1.25862            |
| Allose-5TMS                                                             | 0.23864       | ± 0.00783 | 0.30036          | ± 0.01004 | 0.00074        | 1.25862            |
| 4-Aminobutyric acid-2TMS                                                | 0.00518       | ± 0.00036 | 0.01206          | ± 0.00168 | 0.00131        | 2.32631            |
| Ascorbic acid-4TMS                                                      | 0.00589       | ± 0.00045 | 0.00905          | ± 0.00070 | 0.00122        | 1.53595            |
| Ornithine-4TMS                                                          | 0.07833       | ± 0.00409 | 0.12792          | ± 0.01245 | 0.00170        | 1.63322            |
| Galactosamine-5TMS(1)                                                   | 0.01697       | ± 0.00088 | 0.02491          | ± 0.00148 | 0.00190        | 1.46790            |
| Aconitic acid-3TMS                                                      | 0.00026       | ± 0.00008 | 0.00080          | ± 0.00013 | 0.00211        | 3.00312            |
| Isoleucine-2TMS                                                         | 0.00736       | ± 0.00063 | 0.01285          | ± 0.00144 | 0.00278        | 1.74522            |
| Glyceraldehyde-meto-2TMS(2)                                             | 0.00117       | ± 0.00016 | 0.00244          | ± 0.00025 | 0.00276        | 2.08044            |
| 5-Dehydroquinic acid-5TMS                                               | 0.00086       | ± 0.00010 | 0.00124          | ± 0.00006 | 0.00295        | 1.44342            |
| Ornithine-d7-4TMS                                                       | 0.00612       | ± 0.00060 | 0.01074          | ± 0.00122 | 0.00329        | 1.75493            |
| Sorbose-meto-5TMS(1)                                                    | 0.00476       | ± 0.00030 | 0.00614          | ± 0.00027 | 0.00562        | 1.29063            |
| Tagatose-meto-5TMS(1)                                                   | 0.00179       | ± 0.00010 | 0.00234          | ± 0.00011 | 0.00612        | 1.30427            |
| Inosine-4TMS                                                            | 0.00870       | ± 0.00169 | 0.01892          | ± 0.00290 | 0.00683        | 2.17511            |
| Proline-2TMS                                                            | 0.00551       | ± 0.00048 | 0.00865          | ± 0.00095 | 0.00859        | 1.57011            |
| 1,5-Anhydro-glucitol-4TMS                                               | 0.01396       | ± 0.00057 | 0.01723          | ± 0.00076 | 0.01073        | 1.23455            |
| Galacturonic acid-meto-5TMS(1)                                          | 0.00199       | ± 0.00022 | 0.00305          | ± 0.00025 | 0.01284        | 1.53589            |
| 4-Hydroxyproline-3TMS                                                   | 0.00060       | ± 0.00005 | 0.00098          | ± 0.00009 | 0.01290        | 1.64626            |
| Glucosamine-5TMS(1)                                                     | 0.01071       | ± 0.00093 | 0.01343          | ± 0.00062 | 0.02218        | 1.25321            |
| Rhamnose-4TMS(1)                                                        | 0.00102       | ± 0.00009 | 0.00128          | ± 0.00006 | 0.03240        | 1.24794            |
| Indol-3-acetic acid-TMS                                                 | 0.01979       | ± 0.00142 | 0.02354          | ± 0.00093 | 0.03450        | 1.18954            |

|                           |                   |                   |         |         |
|---------------------------|-------------------|-------------------|---------|---------|
| Galactitol-6TMS           | 0.00917 ± 0.00137 | 0.01325 ± 0.00107 | 0.03552 | 1.44513 |
| Coniferyl alcohol-2TMS    | 0.00354 ± 0.00032 | 0.00422 ± 0.00014 | 0.03570 | 1.19172 |
| Tyramine-3TMS             | 0.00914 ± 0.00074 | 0.01140 ± 0.00061 | 0.03695 | 1.24799 |
| 2-Methylhippuric acid-TMS | 0.00249 ± 0.00051 | 0.00421 ± 0.00051 | 0.04642 | 1.69078 |

**B. Metabolites significantly lower in HIGA mice in 32 weeks old**

| Metabolites                             | Balb/c            | HIGA mice         | p-value  | HIGA/Balb/c |
|-----------------------------------------|-------------------|-------------------|----------|-------------|
| Phosphoenolpyruvic acid-3TMS            | 0.00536 ± 0.00041 | 0.00095 ± 0.00019 | <0.00001 | 0.17784     |
| 2-Hydroxybutyric acid-2TMS              | 0.00243 ± 0.00021 | 0.00075 ± 0.00012 | <0.00001 | 0.30716     |
| Hypotaurine-3TMS                        | 0.02321 ± 0.00217 | 0.00813 ± 0.00048 | 0.00033  | 0.35015     |
| Glycerol 3-phosphate-4TMS               | 0.00827 ± 0.00062 | 0.00411 ± 0.00020 | 0.00030  | 0.49678     |
| N-Acetylmannosamine-met o-4TMS(2)       | 0.05308 ± 0.00458 | 0.02843 ± 0.00171 | 0.00001  | 0.53559     |
| O-Phosphoethanolamine-4TMS              | 0.00261 ± 0.00025 | 0.00101 ± 0.00008 | 0.00041  | 0.38569     |
| Dopamine-4TMS                           | 0.01491 ± 0.00125 | 0.00728 ± 0.00068 | 0.00001  | 0.48847     |
| Oxalic acid-2TMS                        | 0.00302 ± 0.00031 | 0.00110 ± 0.00011 | 0.00053  | 0.36407     |
| Eicosapentaenoic acid-TMS               | 0.18088 ± 0.01689 | 0.07780 ± 0.00585 | 0.00054  | 0.43011     |
| Dihydroxyacetone phosphate-meto-3TMS(1) | 0.00147 ± 0.00015 | 0.00054 ± 0.00007 | 0.00043  | 0.36526     |
| Ribose-meto-4TMS                        | 0.00452 ± 0.00035 | 0.00248 ± 0.00020 | 0.00003  | 0.54858     |
| Ribulose-meto-4TMS                      | 0.00205 ± 0.00017 | 0.00119 ± 0.00008 | 0.00004  | 0.58098     |
| Succinic acid-2TMS                      | 0.00791 ± 0.00087 | 0.00321 ± 0.00023 | 0.00131  | 0.40651     |
| Inositol-6TMS(2)                        | 0.13121 ± 0.01151 | 0.06931 ± 0.00430 | 0.00112  | 0.52827     |
| Dihydroxyacetone phosphate-meto-3TMS(2) | 0.00122 ± 0.00016 | 0.00040 ± 0.00005 | 0.00131  | 0.32713     |
| Dopa-4TMS                               | 0.00415 ± 0.00035 | 0.00249 ± 0.00016 | 0.00008  | 0.60043     |
| Phenol-TMS                              | 0.00352 ± 0.00052 | 0.00080 ± 0.00015 | 0.00158  | 0.22860     |
| Decanoic acid-TMS                       | 0.01619 ± 0.00125 | 0.01032 ± 0.00056 | 0.00009  | 0.63751     |
| Erythrose-meto-3TMS(1)                  | 0.72323 ± 0.02069 | 0.59462 ± 0.01544 | 0.00010  | 0.82217     |
| Hydroxylamine-3TMS                      | 0.05055 ± 0.00244 | 0.03440 ± 0.00199 | 0.00010  | 0.68048     |
| Malic acid-3TMS                         | 0.02395 ± 0.00292 | 0.01106 ± 0.00120 | 0.00011  | 0.46198     |
| Fructose-meto-5TMS(2)                   | 0.22478 ± 0.00986 | 0.17473 ± 0.00549 | 0.00012  | 0.77734     |
| Galactose-meto-5TMS(1)                  | 7.43521 ± 0.28735 | 5.84642 ± 0.18552 | 0.00013  | 0.78632     |
| 4-Hydroxyphenylpyruvic acid-meto-2TMS   | 0.20030 ± 0.00870 | 0.15467 ± 0.00522 | 0.00013  | 0.77218     |
| Phosphoric acid-3TMS                    | 5.62450 ± 0.16438 | 4.89803 ± 0.07155 | 0.00014  | 0.87084     |
| Xylulose-meto-4TMS                      | 0.00209 ± 0.00019 | 0.00130 ± 0.00007 | 0.00019  | 0.62428     |
| 3,6-Epoxydodecanedioic acid-2TMS        | 0.00105 ± 0.00018 | 0.00034 ± 0.00006 | 0.00019  | 0.32197     |
| Acetylglycine-2TMS                      | 0.00289 ± 0.00020 | 0.00195 ± 0.00011 | 0.00020  | 0.67335     |
| Fumaric acid-2TMS                       | 0.02455 ± 0.00092 | 0.01601 ± 0.00130 | 0.00036  | 0.65196     |

|                                 |                   |                   |         |         |
|---------------------------------|-------------------|-------------------|---------|---------|
| 3-Phosphoglyceric acid-4TMS     | 0.00555 ± 0.00034 | 0.00386 ± 0.00022 | 0.00036 | 0.69496 |
| Galactosamine-5TMS(2)           | 0.00891 ± 0.00126 | 0.00334 ± 0.00029 | 0.00400 | 0.37502 |
| Melatonin-2TMS                  | 2.24701 ± 0.26526 | 1.09799 ± 0.13955 | 0.00044 | 0.48865 |
| 3-Aminopropanoic acid-3TMS      | 0.00113 ± 0.00015 | 0.00048 ± 0.00005 | 0.00362 | 0.42646 |
| Galacturonic acid-5TMS(1)       | 0.01320 ± 0.00196 | 0.00485 ± 0.00036 | 0.00498 | 0.36720 |
| 5-Methoxytryptamine-2TMS        | 0.02712 ± 0.00332 | 0.01201 ± 0.00201 | 0.00059 | 0.44282 |
| 4-Hydroxyphenyllactic acid-3TMS | 0.05778 ± 0.00278 | 0.04507 ± 0.00186 | 0.00103 | 0.78001 |
| Uracil-2TMS                     | 0.00263 ± 0.00033 | 0.00147 ± 0.00014 | 0.00115 | 0.56102 |
| 2-Ketoglutaric acid-meto-2TMS   | 0.01814 ± 0.00280 | 0.00837 ± 0.00121 | 0.00130 | 0.46158 |
| Dihydrouracil-TMS               | 0.02307 ± 0.00091 | 0.01922 ± 0.00057 | 0.00140 | 0.83330 |
| Glucose-meto-5TMS(1)            | 15.6395 ± 0.57804 | 13.6673 ± 0.26261 | 0.00190 | 0.87390 |
| 2-Ketobutyric acid-meto-TMS(1)  | 0.00287 ± 0.00014 | 0.00174 ± 0.00021 | 0.00202 | 0.60706 |
| 3-Hydroxyisovaleric acid-2TMS   | 0.00161 ± 0.00012 | 0.00120 ± 0.00006 | 0.00248 | 0.74937 |
| Niacinamide-TMS                 | 0.00512 ± 0.00077 | 0.00247 ± 0.00016 | 0.01307 | 0.48333 |
| Hypoxanthine-2TMS               | 0.00953 ± 0.00096 | 0.00483 ± 0.00090 | 0.00432 | 0.50710 |
| Aspartic acid-3TMS              | 0.00182 ± 0.00017 | 0.00108 ± 0.00014 | 0.00512 | 0.59206 |
| Mannose                         |                   |                   |         |         |
| 6-phosphate-meto-6TMS(1)        | 0.00105 ± 0.00025 | 0.00025 ± 0.00004 | 0.02029 | 0.24148 |
| Glycerol-3TMS                   | 0.20957 ± 0.02171 | 0.13318 ± 0.01499 | 0.00879 | 0.63548 |
| Taurine-3TMS                    | 0.60600 ± 0.11676 | 0.26885 ± 0.01358 | 0.02766 | 0.44365 |
| Spermidine-5TMS                 | 0.00186 ± 0.00026 | 0.00071 ± 0.00025 | 0.01039 | 0.38103 |
| 3-Methylcrotonoylglycine-TMS    | 0.00550 ± 0.00095 | 0.00264 ± 0.00032 | 0.02361 | 0.47955 |
| Taurine-13C2-3TMS               | 0.10576 ± 0.02040 | 0.04757 ± 0.00239 | 0.02895 | 0.44976 |
| Xanthine-3TMS                   | 0.01033 ± 0.00098 | 0.00703 ± 0.00076 | 0.01886 | 0.68063 |
| 2-Hydroxyisobutyric acid-2TMS   | 0.00168 ± 0.00025 | 0.00099 ± 0.00015 | 0.02116 | 0.59212 |
| Stearic acid-TMS                | 1.11677 ± 0.05147 | 0.94987 ± 0.04058 | 0.02408 | 0.85055 |
| Lactic acid-2TMS                | 0.34295 ± 0.04000 | 0.22479 ± 0.02852 | 0.02690 | 0.65546 |
| Trichloroacetic acid-TMS        | 0.08399 ± 0.00923 | 0.05377 ± 0.00777 | 0.02929 | 0.64022 |
| Tyrosine-3TMS                   | 0.00234 ± 0.00009 | 0.00191 ± 0.00016 | 0.03122 | 0.81751 |
| 4-Hydroxybutyric acid-2TMS      | 0.00924 ± 0.00040 | 0.00784 ± 0.00038 | 0.03263 | 0.84793 |
| Glucose-5TMS(1)                 | 3.61107 ± 0.15596 | 3.27590 ± 0.07543 | 0.04034 | 0.90718 |
| Glyoxylic acid-meto-TMS         | 0.01206 ± 0.00108 | 0.00842 ± 0.00106 | 0.04410 | 0.69812 |
| Monostearin-2TMS                | 0.06458 ± 0.00315 | 0.05521 ± 0.00266 | 0.04544 | 0.85486 |

Data were mean ± SEM.
