# Supplementary material for: Use of gas chromatography mass spectrometry to elucidate metabolites predicting the phenotypes of IgA nephropathy in hyper IgA mice
Source: PubMed Central journal article supplement (PMC6619804; doi:10.1371/journal.pone.0219403), 2019-07-10
Supplement: pone.0219403.s011.pdf [file pone.0219403.s011.pdf]

**S4 Table. Metabolites significantly modulated in HIGA mice in both 12 week and 22 week old.**

| <b>A. Metabolites significantly higher in HIGA mice in both 12 week and 22 week old.</b> |                    |                |                    |                |
|------------------------------------------------------------------------------------------|--------------------|----------------|--------------------|----------------|
| <b>Metabolites</b>                                                                       | <b>12 week old</b> |                | <b>22 week old</b> |                |
|                                                                                          | <b>HIGA/Balb/c</b> | <b>p-value</b> | <b>HIGA/Balb/c</b> | <b>p-value</b> |
| Glucuronic acid-5TMS(2)                                                                  | 2.89541            | <0.00001       | 2.49209            | <0.00001       |
| Mannose-meto-5TMS(1)                                                                     | 2.00393            | <0.00001       | 1.36327            | 0.01657        |
| Allose-meto-5TMS(1)                                                                      | 1.98378            | <0.00001       | 1.31069            | 0.02733        |
| Uracil-2TMS                                                                              | 2.19080            | <0.00001       | 1.37760            | 0.01969        |
| Xanthine-3TMS                                                                            | 9.25704            | 0.00006        | 8.03874            | <0.00001       |
| Psicose-5TMS(1)                                                                          | 1.94161            | 0.00007        | 1.64356            | 0.00012        |
| Inositol phosphate-7TMS                                                                  | 1.53509            | 0.00010        | 1.75006            | 0.00099        |
| 2-Ketoisocaproic acid-meto-TMS(2)                                                        | 1.39916            | 0.00013        | 1.40926            | 0.00656        |
| Myristic acid-TMS                                                                        | 1.82336            | 0.00015        | 1.66276            | 0.00010        |
| 4-Aminobenzoic acid-2TMS                                                                 | 18.03908           | 0.00038        | 8.90803            | 0.00005        |
| Xylitol-5TMS                                                                             | 1.45141            | 0.00017        | 1.45456            | 0.00008        |
| Psicose-5TMS(2)                                                                          | 2.23584            | 0.00039        | 1.54426            | 0.00218        |
| Glucuronic acid lactone-3TMS(1)                                                          | 1.57312            | 0.00061        | 1.40717            | 0.00401        |
| 2-Aminoethanol-3TMS                                                                      | 1.27865            | 0.00064        | 1.58605            | 0.00579        |
| Acetylglycine-TMS                                                                        | 1.27865            | 0.00064        | 1.58383            | 0.00095        |
| Glucuronic acid-5TMS(1)                                                                  | 1.68309            | 0.00073        | 1.88544            | 0.00041        |
| Tagatose-5TMS(1)                                                                         | 1.81158            | 0.00103        | 1.47613            | 0.00175        |
| Glucose-5TMS(1)                                                                          | 1.16844            | 0.00143        | 1.21353            | 0.00029        |
| N6-Acetyllysine-2TMS                                                                     | 1.26333            | 0.00147        | 1.24074            | 0.00190        |
| Sorbitol-6TMS                                                                            | 1.93684            | 0.00176        | 1.90193            | 0.00007        |
| Pantothenic acid-3TMS                                                                    | 1.49035            | 0.00183        | 1.48009            | 0.02128        |
| Lyxose-4TMS(1)                                                                           | 3.14900            | 0.00281        | 1.68796            | 0.00586        |
| Indol-3-acetic acid-TMS                                                                  | 1.25844            | 0.00215        | 1.21621            | 0.00509        |
| Fucose-4TMS(1)                                                                           | 1.76489            | 0.00226        | 1.65778            | 0.01158        |
| Inosine-4TMS                                                                             | 20.18891           | 0.00415        | 18.56310           | 0.00001        |
| Galactitol-6TMS                                                                          | 1.83617            | 0.00274        | 2.07812            | 0.00011        |
| Coniferyl alcohol-2TMS                                                                   | 1.34618            | 0.00320        | 1.23151            | 0.02318        |
| Glucuronic acid-meto-5TMS(1)                                                             | 1.53207            | 0.00323        | 1.34646            | 0.00151        |
| meso-Erythritol-4TMS                                                                     | 1.72877            | 0.00360        | 1.41240            | 0.00141        |
| Galactosamine-5TMS(1)                                                                    | 1.66865            | 0.00442        | 1.24245            | 0.00229        |
| Mannose-meto-5TMS(2)                                                                     | 1.21304            | 0.00561        | 1.24611            | 0.00203        |
| Galactose-meto-5TMS(2)                                                                   | 1.21183            | 0.00582        | 1.24730            | 0.00195        |
| Glucose-meto-5TMS(2)                                                                     | 1.21100            | 0.00598        | 1.24616            | 0.00201        |
| N-Acetylglutamine-2TMS                                                                   | 1.21146            | 0.00899        | 1.33230            | 0.00011        |

|                               |         |         |         |         |
|-------------------------------|---------|---------|---------|---------|
| Glucosamine-5TMS(1)           | 1.21603 | 0.00979 | 1.50628 | 0.00246 |
| Lactic acid-2TMS              | 1.75865 | 0.01316 | 2.06501 | 0.01572 |
| Ribulose-4TMS                 | 1.71585 | 0.01521 | 1.57127 | 0.00561 |
| Tyramine-3TMS                 | 1.20258 | 0.01817 | 1.28135 | 0.00231 |
| Fructose-meto-5TMS(2)         | 1.42280 | 0.02393 | 1.21456 | 0.02190 |
| 5-Dehydroquinic acid-5TMS     | 1.28379 | 0.02403 | 1.28189 | 0.02267 |
| Threonic acid-4TMS            | 1.35953 | 0.03235 | 1.54915 | 0.00004 |
| 1,5-Anhydro-glucitol-4TMS     | 1.23604 | 0.03318 | 1.25176 | 0.01222 |
| 2-Hydroxyisobutyric acid-2TMS | 1.73829 | 0.03354 | 2.25805 | 0.01677 |
| Dihydroorotic acid-3TMS       | 1.34028 | 0.03904 | 1.55121 | 0.00733 |
| Galactose-5TMS(2)             | 1.21511 | 0.03987 | 1.26687 | 0.00203 |
| Mannose-5TMS(2)               | 1.21511 | 0.03987 | 1.26687 | 0.00203 |
| Allose-5TMS                   | 1.21511 | 0.03987 | 1.26687 | 0.00203 |
| Taurine-3TMS                  | 1.65940 | 0.04253 | 1.46317 | 0.01300 |
| Taurine-13C2-3TMS             | 1.68299 | 0.04648 | 1.49559 | 0.01146 |

**B. Metabolites significantly lower in HIGA mice in both 12 week and 22 week old.**

| Metabolites                    | 12 week old |          | 22 week old |         |
|--------------------------------|-------------|----------|-------------|---------|
|                                | HIGA/Balb/c | p-value  | HIGA/Balb/c | p-value |
| Tyrosine-3TMS                  | 0.49751     | <0.00001 | 0.54995     | 0.02270 |
| Coniferyl aldehyde-meto-TMS(1) | 0.48068     | 0.00059  | 0.53221     | 0.00568 |
| Hypotaurine-3TMS               | 0.74505     | 0.03020  | 0.79055     | 0.04874 |
| Tryptophan-3TMS                | 0.57495     | 0.04356  | 0.66721     | 0.04408 |
